# Supplementary material for: Infant trunk posture and arm movement assessment using pressure mattress, inertial and magnetic measurement units (IMUs)
Source: PubMed Central journal article supplement (PMC4247204; doi:10.1186/1743-0003-11-133), 2014-09-06

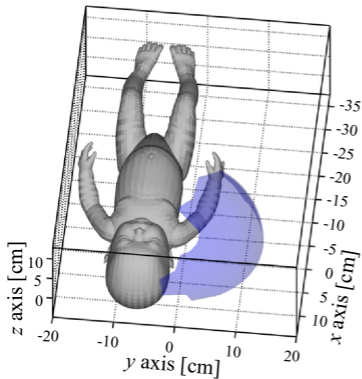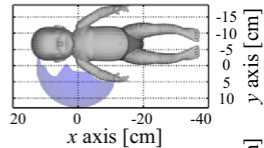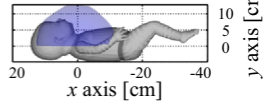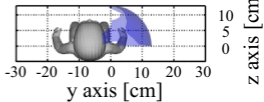

Supplement: 12984_2014_672_MOESM10_ESM.pdf [file 12984_2014_672_MOESM10_ESM.pdf]
